# Supplementary material
Source: publisher figshare collection journal article supplement (https://karger.figshare.com/ndownloader/files/13764107)
Supplement: Supplementary file 1 [file 13764107]

## **Supplementary Material**

### **circZMYM2 Competed Endogenously with miR-335-5p to Regulate JMJD2C in Pancreatic Cancer**

Yong An<sup>a</sup> Huihua Cai<sup>a</sup> Yue Zhang<sup>a</sup> Shengyong Liu<sup>a</sup> Yunfei Duan<sup>a</sup>  
Donglin Sun<sup>a</sup> Xuemin Chen<sup>a</sup> Xiaozhou He<sup>b</sup>

<sup>a</sup>Department of Hepato-Pancreato-Biliary Surgery, the Third Affiliated Hospital of Soochow University, Changzhou,

<sup>b</sup>Departments of Urology, the Third Affiliated Hospital of SooChow University, Changzhou, China

[illegible]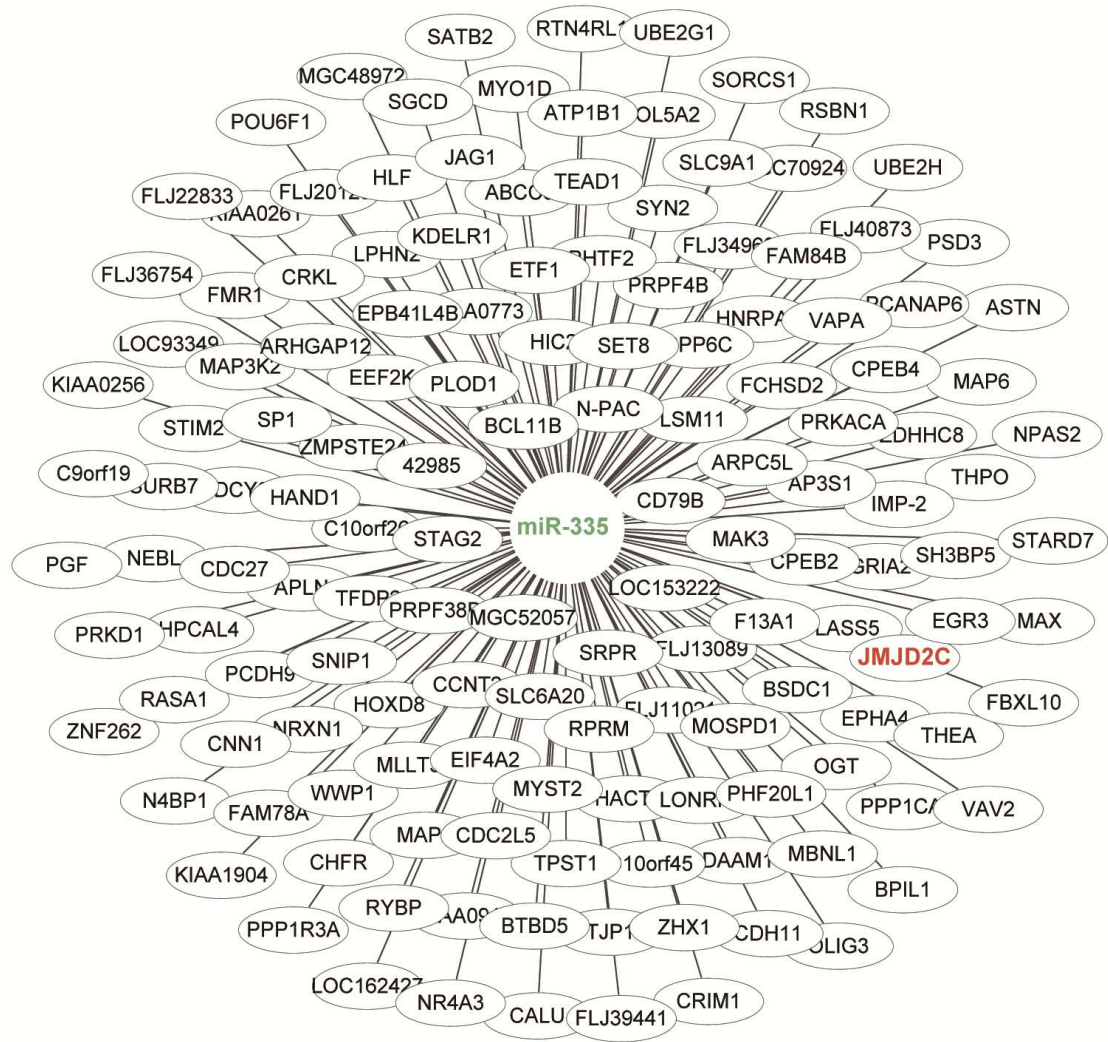

**Figure S1** The targeted genes of miR-335-5p were predicted by TargetScan
